# Supplementary material for: Pirfenidone attenuates bleomycin-induced pulmonary fibrosis in mice by regulating Nrf2/Bach1 equilibrium
Source: Springer Nature journal article supplement (doi:10.1186/s12890-017-0405-7), 2017-04-18
Supplement: MOESM1 [file 12231196]

**Table S1.** PCR primers sequence

---

|       |                  |                       |
|-------|------------------|-----------------------|
| Nrf2  | Forward (5'- 3') | GTGGTTTAGGGCAGAAGG    |
|       | Reverse (5'- 3') | TCTTTCTTACTCTGCCTCTA  |
| Bach1 | Forward (5'- 3') | ACAGGGCTACTCGCAA      |
|       | Reverse (5'- 3') | GTCATCTCCCAGGCTAATC   |
| HO-1  | Forward (5'- 3') | GACAGAAGAGGCTAAGACCGC |
|       | Reverse (5'- 3') | TGACGAAGTGACGCCATCT   |
| GPx1  | Forward (5'- 3') | GCACATCTACCACGCAGTCA  |
|       | Reverse (5'- 3') | AGAGTCTCAAGAACATCGCCT |
| GAPDH | Forward (5'- 3') | AAGACCCAGAAATGAAC     |
|       | Reverse (5'- 3') | TCTACACGATAACAACCA    |

---
